# Supplementary material for: High temperature-functioning ceramic-based ionic liquid electrolyte engraved planar HAp/PVP/MnO2@MnCO3 supercapacitors on carbon cloth
Source: Royal Society of Chemistry journal article supplement (doi:10.1039/d0ta11980f), 2021-01-01
Supplement: d0ta11980f1.pdf [file d0ta11980f1.pdf]

Electronic Supplementary Material (ESI) for Journal of Materials Chemistry A.  
This journal is © The Royal Society of Chemistry

Journal of Materials Chemistry A

RSCPublishing

## Electronic Supplementary Information

### High temperature-functioning ceramic-based ionic liquid electrolyte engraved planar HAp/PVP/MnO<sub>2</sub>@MnCO<sub>3</sub> supercapacitors on carbon cloth

Samayanan Selvam, Jin-Heong Yim\*

Division of Advanced Materials Engineering, Kongju National University, Budaedong 275, Seobuk-gu, Cheonan-si, Chungnam 31080, South Korea

E-mail: [jhyim@kongju.ac.kr](mailto:jhyim@kongju.ac.kr);

[sselvam222@gmail.com](mailto:sselvam222@gmail.com).

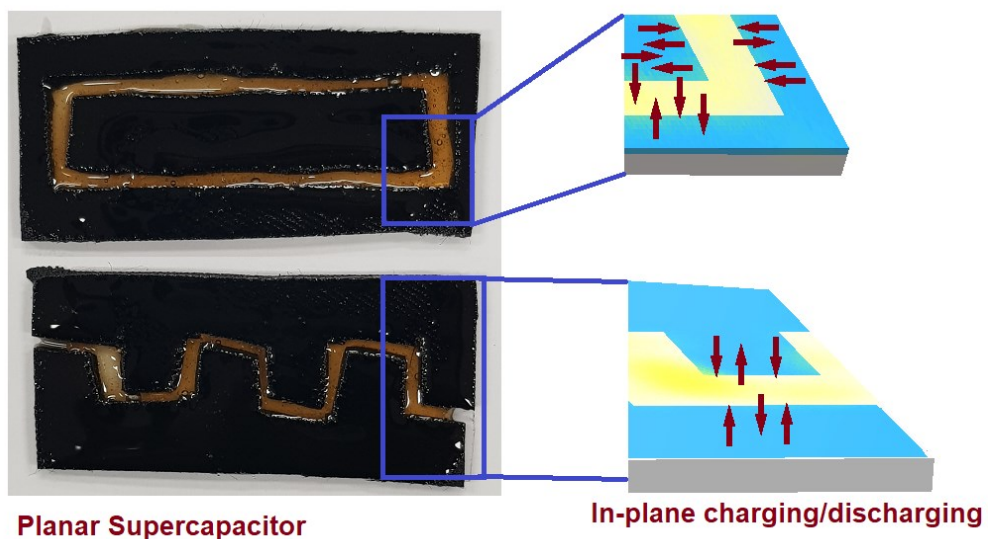

ESI Fig. 1. Schematic illustration of ion migration pathways in planar supercapacitor.

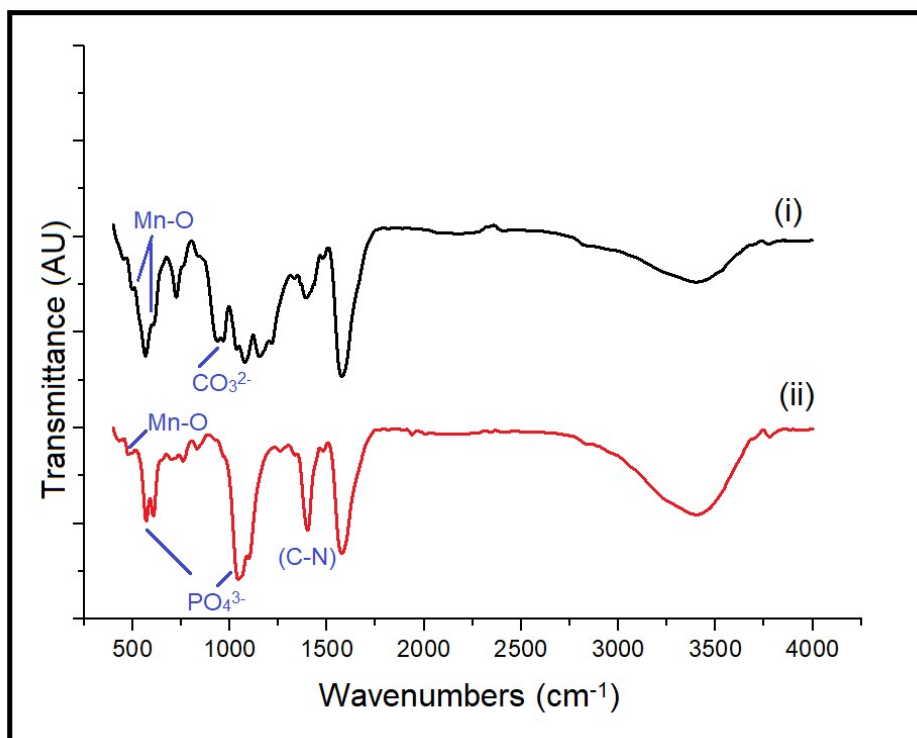

ESI Fig. 2. FTIR spectra of  $\text{MnO}_2@\text{MnCO}_3$  (i) and HAp/PVP/  $\text{MnO}_2@\text{MnCO}_3$  (ii) composite.

The FTIR spectrum of  $\text{MnO}_2@\text{MnCO}_3$  shows typical peaks around  $790$ ,  $860$  and  $1550\text{cm}^{-1}$ , which are dominant for carbonate ions ( $\text{CO}_3^{2-}$ ). The peaks at  $480\text{ cm}^{-1}$  and  $651\text{cm}^{-1}$  attributed for Mn-O and this study evidenced for the formation of  $\text{MnO}_2@\text{MnCO}_3$ . The HAp/PVP/ $\text{MnO}_2@\text{MnCO}_3$  composite spectrum presence of the characteristic peaks at  $3560\text{ cm}^{-1}$  for vibration modes of hydroxyl groups. The  $\text{PO}_4^{3-}$  peaks are clearly existing at  $510$  and  $560\text{ cm}^{-1}$ . Also, the C-N peaks indicates the PVP incorporation in the composites. The remark of these peaks indicates that the  $\text{CO}_3^{2-}$ , Mn-O, C-N and  $\text{PO}_4^{3-}$  groups in the HAp/PVP/  $\text{MnO}_2@\text{MnCO}_3$ , thus confirming the survival  $\text{MnO}_2$  and  $\text{MnCO}_3$  in the prepared composites.<sup>1-3</sup>

ESI Tab. 1 Pore diameter calculations from SEM results

| <b>Label</b>         | <b>Pore diameter (nm)</b> | <b>Mean</b> | <b>Min</b> | <b>Max</b> | <b>Angle</b> |
|----------------------|---------------------------|-------------|------------|------------|--------------|
| 1                    | 29                        | 17.831      | 3          | 90         | -15.524      |
| 2                    | 16                        | 18.703      | 1.113      | 63.5       | -93.945      |
| 3                    | 25                        | 31.624      | 6.917      | 76.75      | -40.732      |
| 4                    | 20                        | 35.033      | 13.473     | 50.302     | 13.671       |
| 5                    | 5                         | 79.088      | 54.625     | 105.5      | -69.444      |
| 6                    | 6                         | 97.8        | 87.4       | 112        | -29.055      |
| 7                    | 13                        | 67.172      | 3.75       | 130        | -25.463      |
| 8                    | 9                         | 9.215       | 1.438      | 30.5       | -31.608      |
| 10                   | 7                         | 106.595     | 85.333     | 123.083    | 4.764        |
| 11                   | 9                         | 12.205      | 0          | 62.5       | 0            |
| <b>Mean</b>          |                           |             |            |            |              |
| <b>Pore diameter</b> | 13.9                      | 47.527      | 25.705     | 84.414     | -28.734      |
| SD                   | 8.373                     | 36.871      | 35.828     | 33.094     | 33.322       |
| Min                  | 5                         | 9.215       | 0          | 30.5       | -93.945      |
| Max                  | 29                        | 106.595     | 87.4       | 130        | 13.671       |

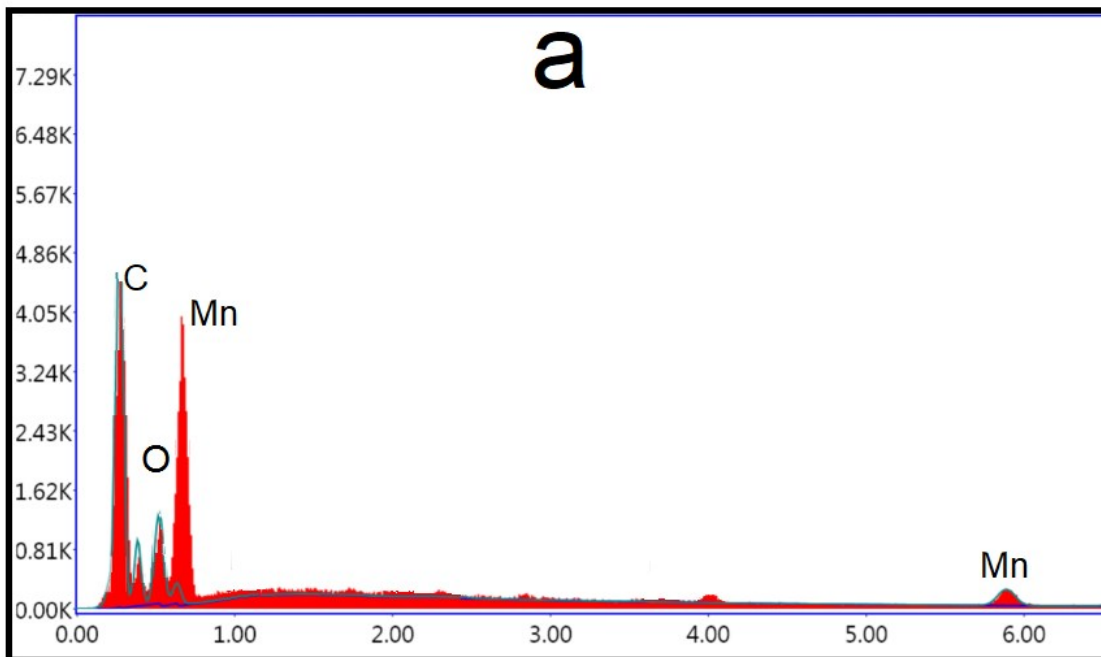

Lsec: 30.0 0 Cnts 0.000 keV Det: Octane Super Det

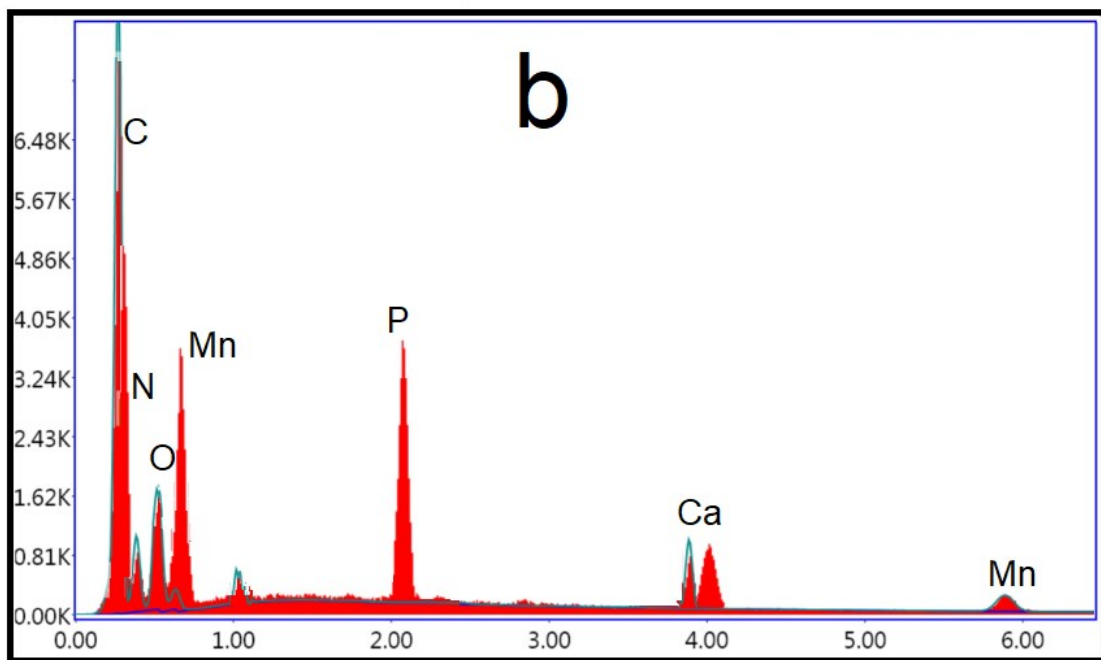

Lsec: 30.0 0 Cnts 0.000 keV Det: Octane Super Det

ESI Fig. 3. EDX analysis of  $\text{MnO}_2@/\text{MnCO}_3$  (a) and HAp/PVP/ $\text{MnO}_2@/\text{MnCO}_3$  (b) composite.

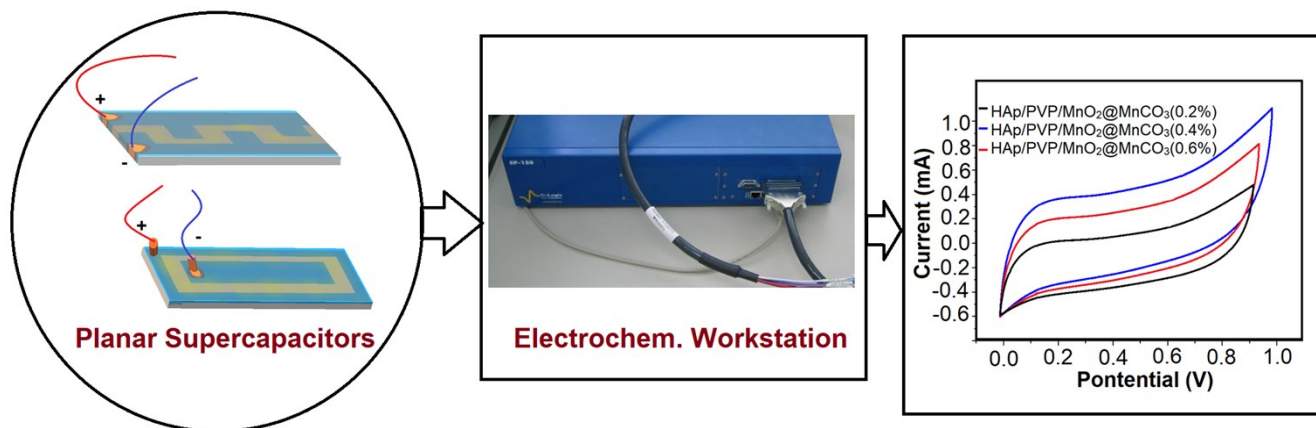

ESI Fig. 4. Electrochemical setup of planar supercapacitors

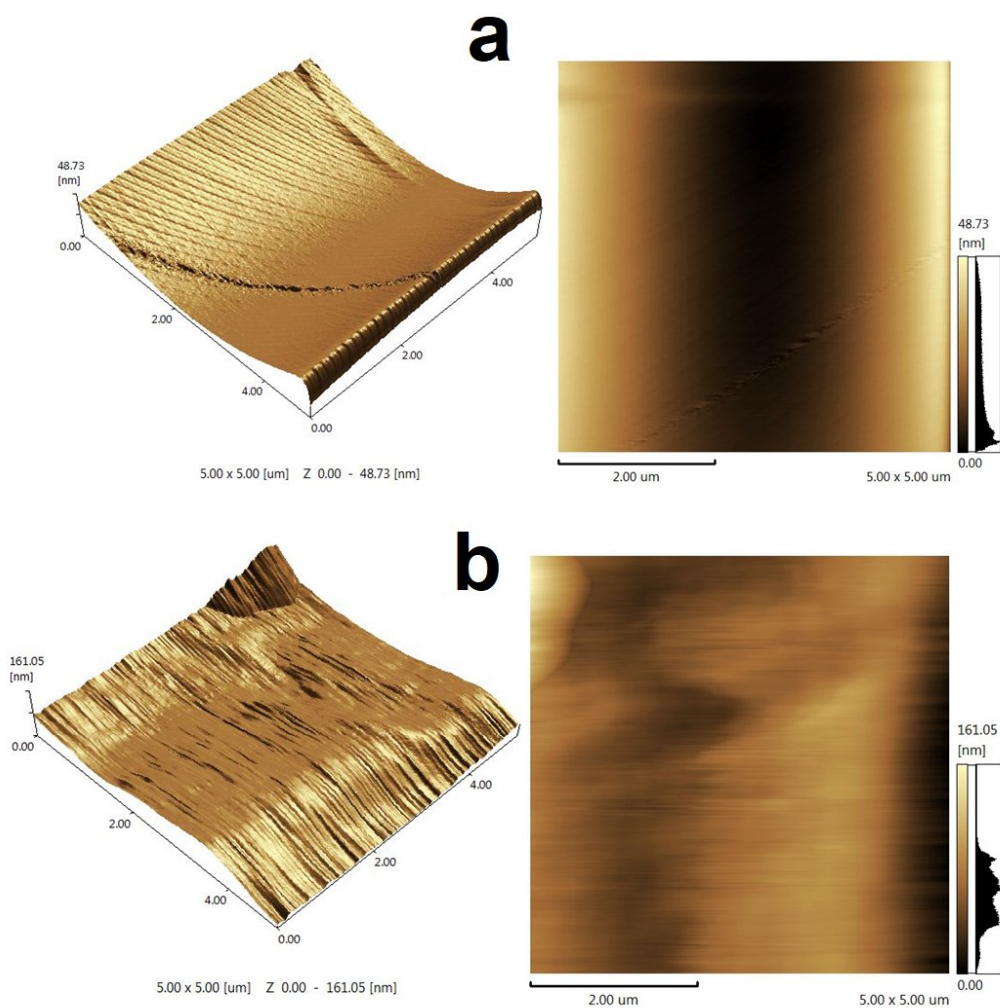

ESI Fig.5 AFM images of a. Carbon fabric (18.7nm) and b. HAp/PVP/MnO<sub>2</sub>@MnCO<sub>3</sub> (0.2%) composite coated fabric (161.05nm)

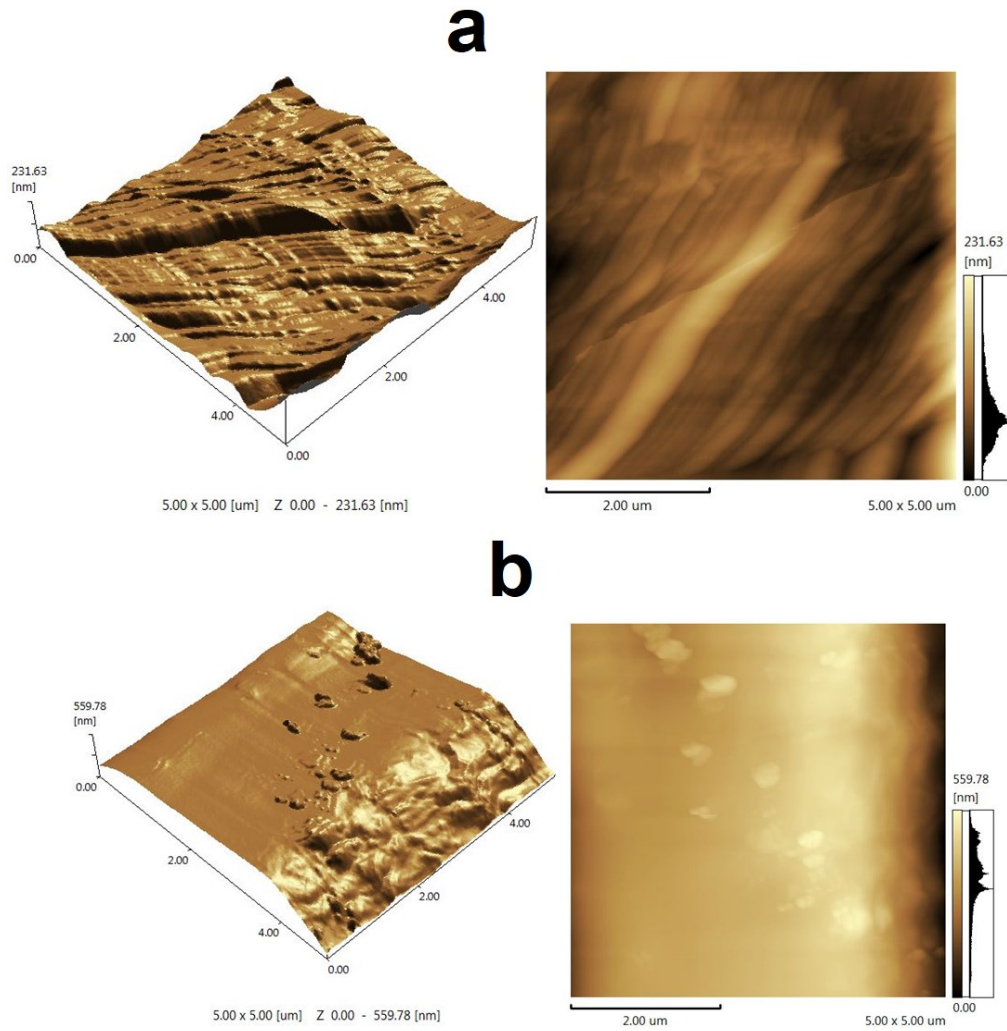

ESI Fig.6 AFM images of a. HAp/PVP/MnO<sub>2</sub>@MnCO<sub>3</sub> (0.4%) (231.63nm) and b. HAp/PVP/MnO<sub>2</sub>@MnCO<sub>3</sub> (0.6%) composite coated fabric (559.78nm)

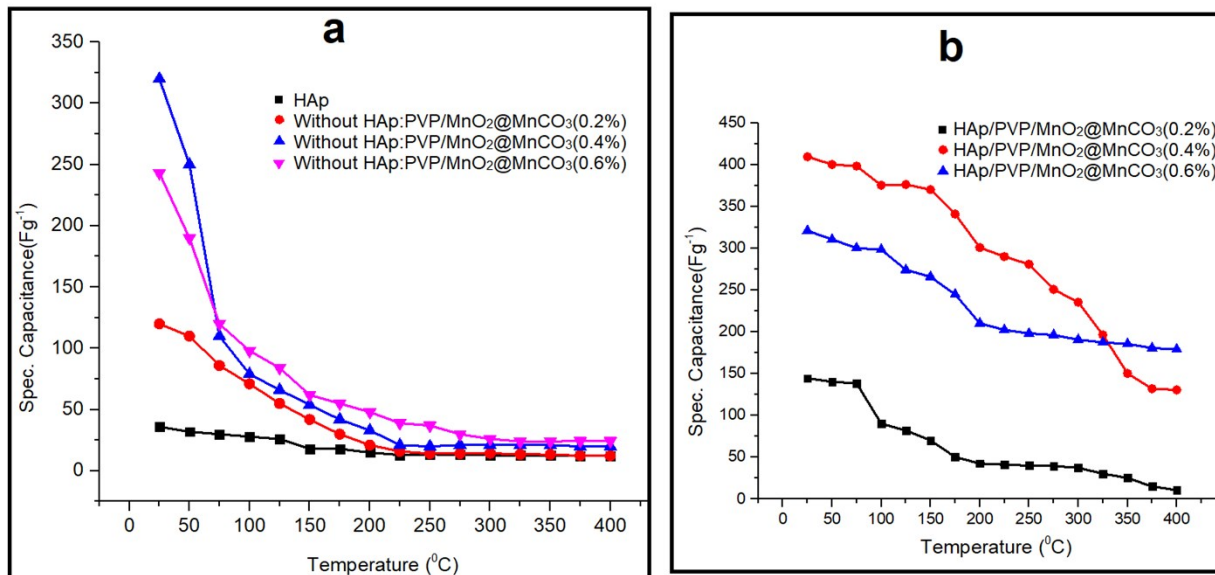

ESI Fig. 7. High temperature functioning performance of planner supercapacitors with HAp and without HAp.

### Calculations

The Gravimetric specific capacitance was calculated from the galvanostatic discharge curves, using the following equation 1.

$$C = \frac{I\Delta t}{m\Delta V} \dots\dots 1$$

Also, the aerial capacitance was calculated from equation 2

$$c C = \frac{I\Delta t}{A\Delta V} \dots\dots 2$$

Where (I) is charge or discharge current,  $\Delta t$  (s) is the time for a full charge or discharge,  $m$  (g) designates the mass of the active material,  $A$  is the area of the active materials and  $\Delta V$  signifies the voltage change after a full charge or discharge.

The energy density (E) considered by equation 3 .

$$E = \frac{C(\Delta V)^2}{2} Whkg^{-1} \dots\dots 3$$

Where C is the specific capacitance of the active materials, and  $\Delta V$  is the potential window of discharge.<sup>4</sup>

ESI Tab.2 Specific capacitance and Energy density profile of planner supercapacitors with HAp and without HAp.

| Supercapacitor samples                                | Specific Capacitance (Fg <sup>-1</sup> ) | Energy Density (Whkg <sup>-1</sup> ) |
|-------------------------------------------------------|------------------------------------------|--------------------------------------|
| HAp                                                   | 36.2                                     | 5.1                                  |
| Without HAP(MnO <sub>2</sub> @MnCO <sub>3</sub> )0.2% | 120.4                                    | 16.7                                 |
| Without HAP(MnO <sub>2</sub> @MnCO <sub>3</sub> )0.4% | 320.1                                    | 44.5                                 |
| Without HAP(MnO <sub>2</sub> @MnCO <sub>3</sub> )0.6% | 243.3                                    | 33.8                                 |
| HAP/PVP/ MnO <sub>2</sub> @MnCO <sub>3</sub> (0.2%)   | 144.5                                    | 20.1                                 |
| HAP/PVP/ MnO <sub>2</sub> @MnCO <sub>3</sub> (0.4%)   | 409.5                                    | 56.9                                 |
| HAP/PVP/ MnO <sub>2</sub> @MnCO <sub>3</sub> (0.6%)   | 325.1                                    | 45.2                                 |

## References

1. N. F. MahamadYusof, N. H. Idris, M. F. Din, S. R. Majid, N. Harun, M. M. Rahman, (2020) 10:9207 | <https://doi.org/10.1038/s41598-020-66148-w>
2. M. Manoj, D. Mangalaraj, N. Ponpandian and C. Viswanathan, RSC Adv., 2015, 5, 48705-48711
3. Z. Yang, Y. Jiang, L. X. Yu, B. Wen, F. Li, S. Sun and T. Hou, J. Mater. Chem., 2005, 15, 1807–1811
4. S. Selvam, B. Balamuralitharan, S.N. Karthick, K.V.Hemalatha, K. Prabakar and Hee-Je Kim, Anal. Methods, 2016, 8, 7937-7943.
